# Supplementary material
Source: PubMed Central journal article supplement (PMC3697253)
Supplement: JB.00148-13_zjb999092641so1.pdf [file JB.00148-13_zjb999092641so1.pdf]

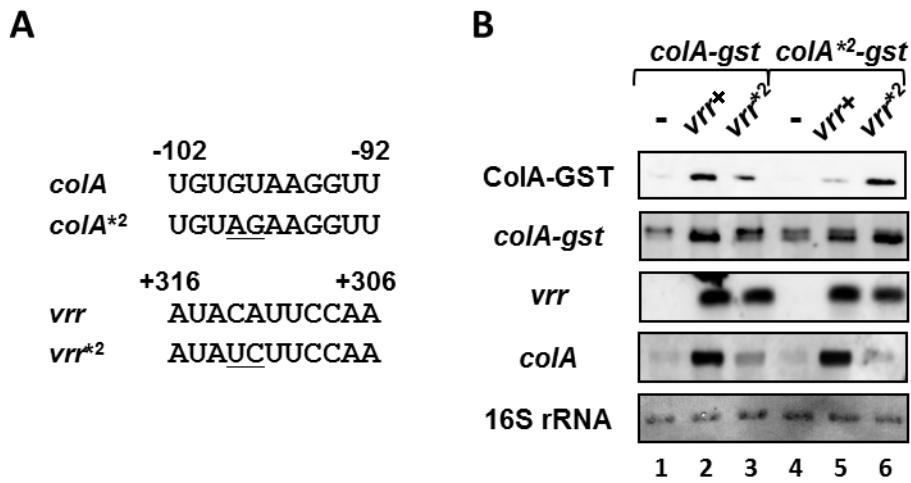

**Supplementary Figure S1** Complementarity between VR-RNA and *colA* mRNA 5'UTR is important for *colA* regulation.

(A) Mutation sites within VR-RNA-*colA* RNA duplex. Mutation sites in *colA* mRNA 5'UTR or VR-RNA are underlined. (B) Western and Northern blots of VR-RNA-deficient strains carrying *colA-gst* or *colA-gst* mut2 and *vrr*, a gene encoding VR-RNA, or *vrr* mut2 co-expression vector. Each lane was loaded with 0.02 A<sub>280</sub> units of extracellular protein or with 0.5 μg of total RNA from cells grown to the mid-exponential growth phase at 37°C. GST fusion protein was probed with anti-GST antibody (top panel). Chromosomally encoded *colA* mRNA, *colA-gst* and plasmid-encoded VR-RNA were detected using specific probes. Methylene blue-stained 16S rRNAs are indicated at bottom as loading controls.

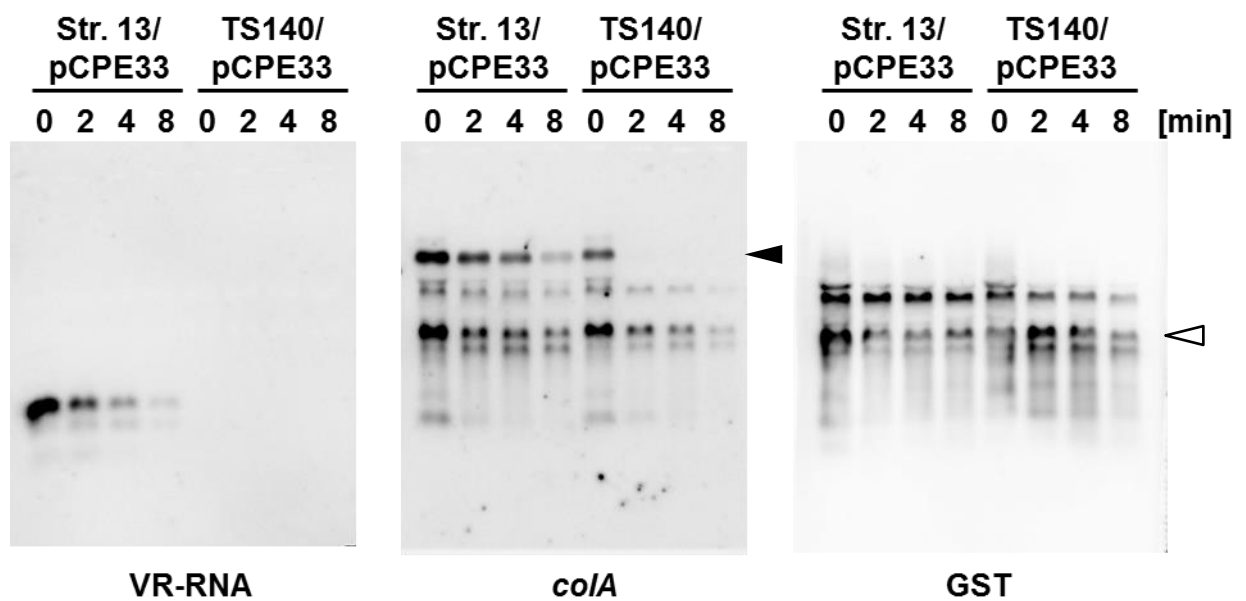

**Supplementary Figure S2** Stability of *colA-gst* mRNA. Northern blot analysis was performed using 0.5  $\mu\text{g}$  of total RNA isolated from *C. perfringens* strain 13 and TS140 (*vrr*-deficient mutant) harboring pCPE33 containing *colA-gst* gene. These strains were grown to the mid-exponential phase at 37°C in GAM broth and then, rifampicin (200  $\mu\text{g}/\text{ml}$ ) was added to the culture. Total RNA (1  $\mu\text{g}$ ) isolated from the cells harvested at indicated time after addition of rifampicin were loaded in each lane. VR-RNA, *colA* and *gst* gene-specific probes were used for detection of VR-RNA, chromosomally encoded *colA* and *colA-gst* mRNA, respectively. Filled and open triangles represent *colA* and *colA-gst* transcripts, respectively.

**A**

|         |                            |                        |
|---------|----------------------------|------------------------|
|         | <b>SD</b>                  | <b>Start<br/>codon</b> |
| WT      | AGGAGGCATTTAAACATG         |                        |
| mut SD  | <u>AAAAAG</u> CATTTAAACATG |                        |
| mut AUG | AGGAGGCATTTAAAC <u>AAA</u> |                        |

**B**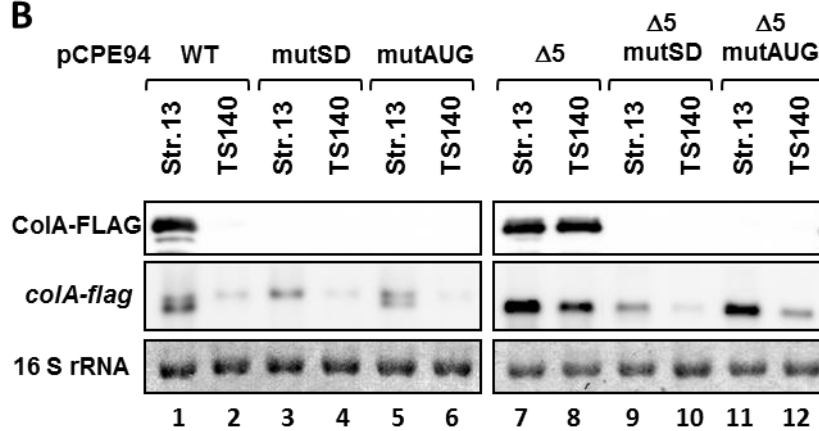

**Supplementary Figure S3** Ribosome binding to the SD sequence of *colA-flag* mRNA is required to stabilization of the transcript. A. Ribosome binding site and start codon of the *colA-flag* gene. The mutated nucleotides in the mutant *colA-flag* gene are indicated by red. Western and northern blot analysis is carried out using 0.2 O.D.<sub>600</sub> unit of extracellular protein and 1  $\mu$ g of total RNA isolated from *C. perfringens* strain 13 and TS140 harboring pCPE94 vector in which the SD sequence or AUG start codon of *colA-flag* gene was mutated. The processed transcript was initially transcribed from pCPE94 $\Delta 5$  derivative in which processed region in *colA-flag* 5'UTR was removed. ColA-FLAG protein and *colA-flag* mRNA were detected by using anti-DYKDDDK antibody and DIG-labeled *colA* gene-specific probe. Methylene blue-stained 16S rRNAs are indicated at bottom as loading controls.



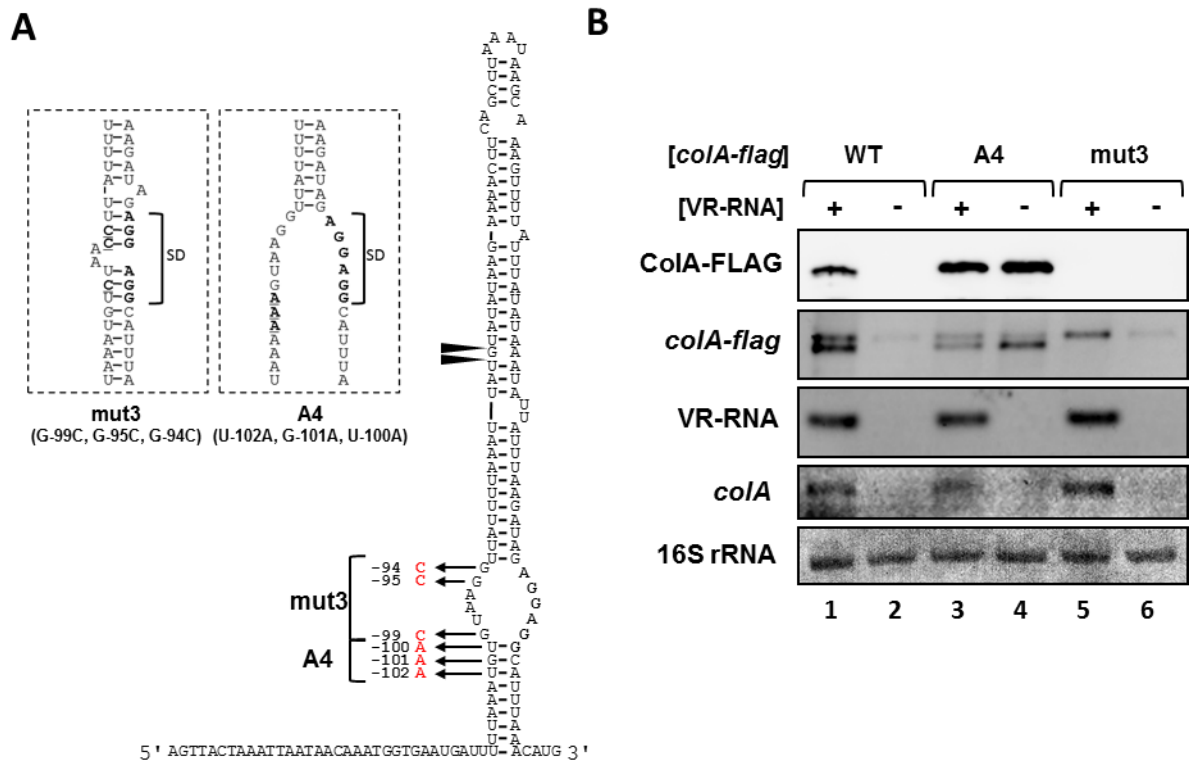

**Supplementary Figure S5** Disruption and strengthening of stem-loop structure in *colA* mRNA induce and inhibit the translation, respectively. (A) The location of the point mutations which disrupt or strengthen the stem-loop structure is indicated on the predicted *colA* mRNA secondary structure. (B) ColA-FLAG protein and *colA-flag* mRNA expression was analyzed on western and northern blots. Extracellular protein (0.02 O.D.<sub>600</sub> unit) or Total RNA (1  $\mu$ g) were extracted from *C. perfringens* strain 13 and TS140 harboring various *colA-flag* genes grown to the mid-exponential phase, and were probed with anti-DYKDDDK antibody or DIG-labeled *colA* and *vrr* gene-specific probes. Methylene blue-stained 16S rRNAs are indicated at bottom as loading controls.

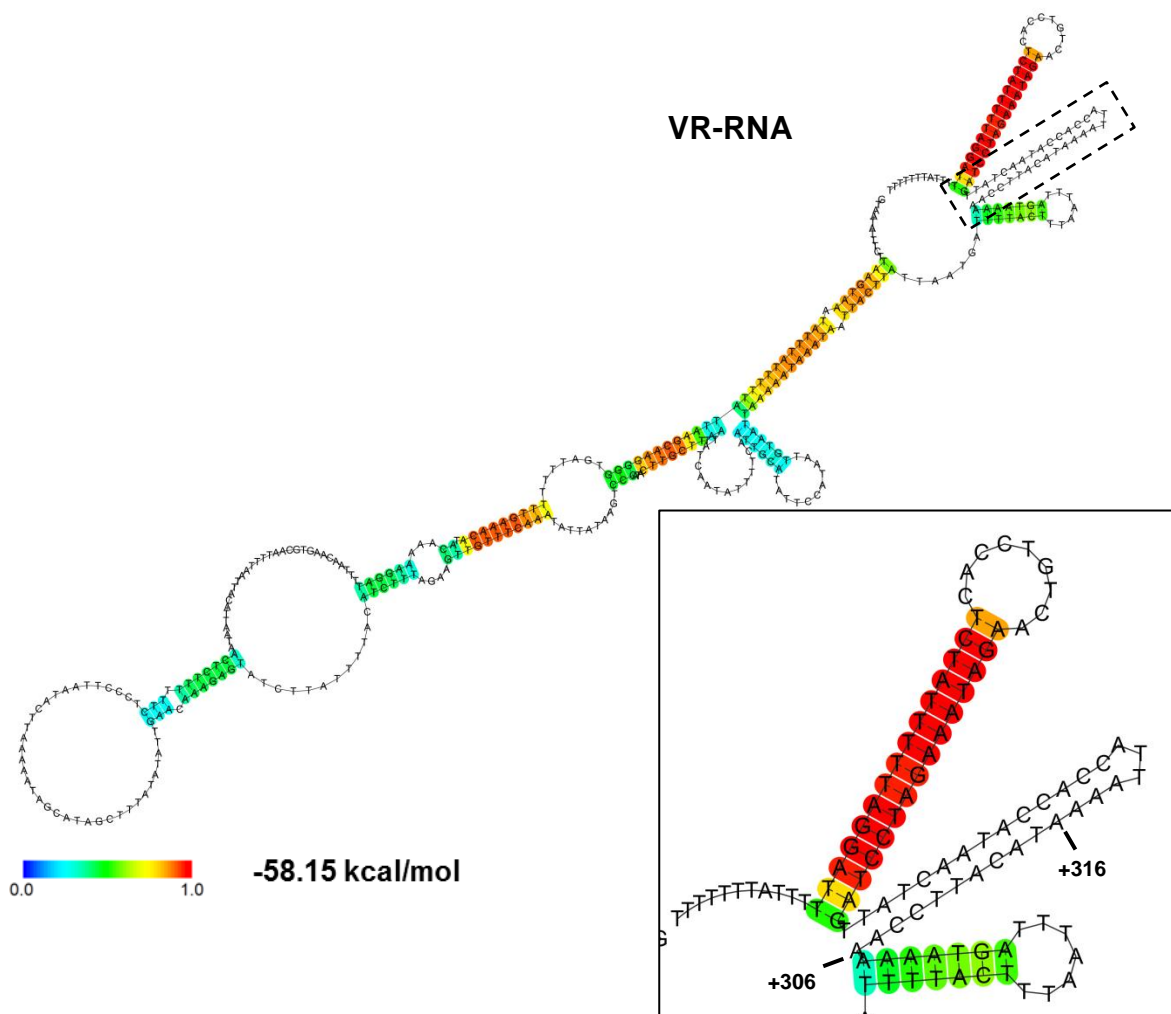

**Supplementary Figure S6** Secondary structure of VR-RNA. The RNA secondary structure was predicted by CentroidFold (<http://www.ncrna.org/centroidfold/>). Each predicted base pairing is indicated by the heat color gradation from blue to red corresponding to the base pairing probability from 0 to 1. The region important for base pairing with *colA* mRNA is boxed by dashed line and is uncolored, indicating that RNAs within the region are unpaired. The right inset shows a larger magnification of 3' region of VR-RNA.

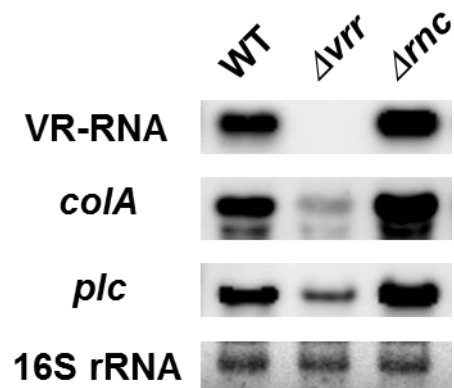

**Supplementary Figure S7** Ribonuclease III is not involved in *colA* expression. VR-RNA and *colA* and *plc* mRNA expression was analyzed by northern blot analysis using DIG-labeled *vrr*, *colA* and *plc* gene-specific probes. Total RNA (2 μg) extracted from strain 13 and *vrr* or *mrc*-deficient strains grown to the mid-exponential phase were used in each lane. Methylene blue-stained 16S rRNAs are indicated at bottom as loading controls.

**Table S1. Oligonucleotides used in this study**

| Name     | Sequence 5' to 3'                                                  | Used for                             |
|----------|--------------------------------------------------------------------|--------------------------------------|
| NOB-0390 | GGACTAGTCCAATTCAAATTATTCTCG                                        | VR-RNA-expression vector             |
| NOB-0393 | GCGCGCCGGCAAAAATAATTATCATTAGT                                      | VR-RNA-expression vector             |
| NOB-0068 | GGCCGGATCCTTACTGAGTTGCCAATAAAG                                     | <i>colA-flag</i> -expression vector  |
| NOB-0084 | GCGCGTCGACTTAACTTTATCGTCATCATCTTTATAATCGTT<br>TTTAGCATCATATCCCTTAG | <i>colA-flag</i> -expression vector  |
| NOB-0398 | GGTTTTTACTATTAATAAGTAAAATCATT                                      | VR-RNA mut5 mutation                 |
| NOB-0399 | TTACATAAAAATTACCACCATAACTATTGAT                                    | VR-RNA mut5 mutation                 |
| NOB-0400 | TAATTTAGTAAAAACGTTACATAAAAATTACCACC                                | VR-RNA mut1 mutation                 |
| NOB-0401 | GGTAATTTTATGTAACGTTTTTTACTAAATTAAG                                 | VR-RNA mut1 mutation                 |
| NOB-0402 | TAATTTAGTAAAAACGTTCTATAAAAATTACCACC                                | VR-RNA mut2 mutation                 |
| NOB-0403 | GGTAATTTTATAGAACGTTTTTTACTAAATTAAG                                 | VR-RNA mut2 mutation                 |
| NOB-0388 | ACATAAAAATTACCAgCATAACTATTGATCC                                    | VR-RNA mut4 mutation                 |
| NOB-0389 | GATCAATAGTTATGcTGGTAATTTTATGTA                                     | VR-RNA mut4 mutation                 |
| NOB-0391 | TAATTTAGTAAAAAGGTTAGATAAAAATTACCACC                                | VR-RNA mut3 mutation                 |
| NOB-0392 | GGTAATTTTATCTAACCTTTTTTACTAAATTAAG                                 | VR-RNA mut3 mutation                 |
| NOB-0383 | GGCCGAATTCGTAATATTTCTTAAGTAAA                                      | <i>in vitro</i> transcription vector |
| NOB-0386 | GCGCAAGCTTAATCCTAAAAATAGAGTGGACAG                                  | <i>in vitro</i> transcription vector |
| NOB-0011 | GCCGGGATCCGTTTAAATGCCTCCTCTATC                                     | <i>in vitro</i> transcription vector |
| NOB-0370 | CTAATACGACTCACTATAGGGAGTTACTAAATTAATAACAAA<br>TGGTG                | <i>in vitro</i> transcription vector |
| NOB-0045 | TGAATGATTTTTTAAaaaGTAAGGTTATTTTTAAA                                | <i>colA</i> A4 mutation              |
| NOB-0046 | TTTAAAAATAACCTTACttTTTTAAAAATCATTCA                                | <i>colA</i> A4 mutation              |
| NOB-0047 | GGAGGCATTTAAACAAAAAGAAAAACTTAAAAAG                                 | <i>colA</i> AUG mutation             |
| NOB-0048 | CTTTTTAAGTTTTTCTTTTTGTTTAAATGCCTCC                                 | <i>colA</i> AUG mutation             |
| NOB-0051 | TGAATGATTTTTTAAATaTGTAAGGTTATTTTTAAA                               | <i>colA</i> G-101A mutation          |
| NOB-0052 | TTTTAAAAATAACCTTACAtTTTTAAAAATCATTCA                               | <i>colA</i> G-101A mutation          |
| NOB-0053 | TGATTTTTAAATGTCTAACCTTATTTTTAAATTATG                               | <i>colA</i> mut3 mutation            |
| NOB-0054 | AATTTAAAAATAAGGTTAGACATTTAAAAATCATTTC                              | <i>colA</i> mut3 mutation            |
| NOB-0055 | TGATTTTTAAATGTGTAACGTTATTTTTAAATTATG                               | <i>colA</i> mut1 mutation            |
| NOB-0056 | AATTTAAAAATAACGTTACACATTTAAAAATCATTTC                              | <i>colA</i> mut1 mutation            |
| NOB-0057 | GAATGATTTTTAAATGTAGAACGTTATTTTTAAATTATG                            | <i>colA</i> mut2 mutation            |
| NOB-0058 | AATTTAAAAATAACGTTCTACATTTAAAAATCATTTC                              | <i>colA</i> mut2 mutation            |
| NOB-0059 | CAAATGGTGAATGATTaAAaAAaGTAAGGTTATTTTTAAATTA<br>TG                  | <i>colA</i> A1 mutation              |
| NOB-0060 | TTTTAAAAATAACCTTACttTTTTttAATCATTACCAATTTG                         | <i>colA</i> A1 mutation              |
| NOB-0063 | ATGTGTAAGGTTAaaaaAAAaaATGTATATAAGAAA                               | <i>colA</i> A2 mutation              |
| NOB-0064 | TTCTTATATACAtTTTTttTAACCTTACACATT                                  | <i>colA</i> A2 mutation              |
| NOB-0065 | TAACCTTACACATTTttAATCATTACCAATTTG                                  | <i>colA</i> A3mutation               |
| NOB-0107 | TTAAATTATtTATATAAGAAAACCTTCAGC                                     | <i>colA</i> G-79U mutation           |
| NOB-0108 | AGTTTTCTTATATAaATAATTTAAAATAACCTTAC                                | <i>colA</i> G-79U mutation           |
| NOB-0109 | TTAAATTATaTATATAAGAAAACCTTCAGC                                     | <i>colA</i> G-79A mutation           |
| NOB-0110 | AGTTTTCTTATATAtATAATTTAAAATAACCTTAC                                | <i>colA</i> G-79A mutation           |
| NOB-0111 | TTAAATTATcTATATAAGAAAACCTTCAGC                                     | <i>colA</i> G-79C mutation           |
| NOB-0112 | AGTTTTCTTATATAgATAATTTAAAATAACCTTAC                                | <i>colA</i> G-79C mutation           |



**Table S2. Plasmids used in this study**

| <b>Name</b> | <b>Description</b>                                                                       | <b>Reference</b>             |
|-------------|------------------------------------------------------------------------------------------|------------------------------|
| pJIR418     | <i>E. coli</i> - <i>C. perfringens</i> shuttle vector, Cm <sup>R</sup> , Em <sup>R</sup> | Sloan J <i>et al.</i> (1992) |
| pGEM3zf (+) | cloning vector, Amp <sup>R</sup>                                                         | promega                      |
| pVrr        | VR-RNA-expression vector                                                                 | This study                   |
| pVrrmut1    | VR-RNA mut1-expression vector                                                            | This study                   |
| pVrrmut2    | VR-RNA mut2-expression vector                                                            | This study                   |
| pVrrmut3    | VR-RNA mut3-expression vector                                                            | This study                   |
| pVrrmut4    | VR-RNA mut4-expression vector                                                            | This study                   |
| pVrrmut5    | VR-RNA mut5-expression vector                                                            | This study                   |
| pVrrmut6    | VR-RNA mut6-expression vector                                                            | This study                   |
| pCPE33      | <i>cola-gst</i> -expression vector                                                       | Obana <i>et al.</i> (2010)   |
| pCPE31      | <i>cola</i> (D+2-78)- <i>gst</i> -expression vector                                      | Obana <i>et al.</i> (2010)   |
| pCPE111     | <i>cola-gst</i> and VR-RNA-expression vector                                             | This study                   |
| pCPE112     | <i>cola-gst</i> and VR-RNA mut1-expression vector                                        | This study                   |
| pCPE113     | <i>cola mut1-gst</i> and VR-RNA-expression vector                                        | This study                   |
| pCPE114     | <i>cola mut1-gst</i> and VR-RNA mut1-expression vector                                   | This study                   |
| pCPE210     | <i>cola-gst mut2</i> -expression vector                                                  | This study                   |
| pCPE212     | <i>cola-gst</i> and VR-RNA mut2-expression vector                                        | This study                   |
| pCPE213     | <i>cola mut2-gst</i> and VR-RNA-expression vector                                        | This study                   |
| pCPE214     | <i>cola mut2-gst</i> and VR-RNA mut2-expression vector                                   | This study                   |
| pCPE310     | <i>cola-gst mut3</i> -expression vector                                                  | This study                   |
| pCPE312     | <i>cola-gst</i> and VR-RNA mut3-expression vector                                        | This study                   |
| pCPE313     | <i>cola mut3-gst</i> and VR-RNA-expression vector                                        | This study                   |
| pCPE314     | <i>cola mut3-gst</i> and VR-RNA mut3-expression vector                                   | This study                   |
| pCPE94      | <i>cola-flag</i> -expression vector                                                      | This study                   |
| pCPE94Δ5    | <i>cola</i> (D+2-78)- <i>flag</i> -expression vector                                     | This study                   |
| pCPE94A1    | <i>cola-flag</i> A1-expression vector                                                    | This study                   |
| pCPE94A2    | <i>cola-flag</i> A2-expression vector                                                    | This study                   |
| pCPE94A3    | <i>cola-flag</i> A3-expression vector                                                    | This study                   |
| pCPE94A4    | <i>cola-flag</i> A4-expression vector                                                    | This study                   |
| pCPE94A5    | <i>cola</i> (G-101A)- <i>flag</i> -expression vector                                     | This study                   |
| pCPE94GC3   | <i>cola-flag</i> GC3-expression vector                                                   | This study                   |
| pCPE95      | <i>cola</i> (G-79U)- <i>flag</i> -expression vector                                      | This study                   |
| pCPE96      | <i>cola</i> (G-79A)- <i>flag</i> -expression vector                                      | This study                   |
| pCPE97      | <i>cola</i> (G-79C)- <i>flag</i> -expression vector                                      | This study                   |
| pCPE98      | <i>cola-flag</i> with mutated SD-expression vector                                       | This study                   |
| pCPE99      | <i>cola-flag</i> with mutated AUG start codon-expression vector                          | This study                   |
| pCPE95-1    | <i>cola</i> (G-79U, U-74G)- <i>flag</i> -expression vector                               | This study                   |
| pCPE95-2    | <i>cola</i> (G-79U, U-80G)- <i>flag</i> -expression vector                               | This study                   |
| pNOE40      | T7 template of VR-RNA derived from pGEM3zf (+)                                           | This study                   |
| pNOE41      | T7 template of VR-RNA mut1 derived from pGEM3zf (+)                                      | This study                   |
| pNOE42      | T7 template of VR-RNA mut2 derived from pGEM3zf (+)                                      | This study                   |
| pNOE43      | T7 template of VR-RNA mut3 derived from pGEM3zf (+)                                      | This study                   |
| pNOE44      | T7 template of VR-RNA mut4 derived from pGEM3zf (+)                                      | This study                   |
| pNOE45      | T7 template of VR-RNA mut5 derived from pGEM3zf (+)                                      | This study                   |
| pNOE46      | T7 template of VR-RNA mut6 derived from pGEM3zf (+)                                      | This study                   |
